# Supplementary material
Source: publisher site journal article supplement (https://www.spandidos-publications.com/7456/downloadSupplementary)
Supplement: Supplementary file 1 [file downloadSupplementary]

## Sheet: Supplementary Table3
Table SIII. DELs associated with m7G.
gene_name1	gene_name2	cor_r	pvalue
EIF4A1	CTBP1.AS	0.503344	4.18e-18
EIF4A1	FLNB.AS1	0.413619	3.63e-12
EIF4A1	YEATS2.AS1	0.461365	4.14e-15
EIF4A1	RHOA.IT1	0.508898	1.56e-18
EIF4A1	LINC01287	0.402113	1.59e-11
EIF4A1	SMAD9.IT1	0.450735	2.05e-14
EIF4A1	WDR7.OT1	0.415133	2.97e-12
METTL1	AC062028.1	0.403222	1.38e-11
NCBP2	BAALC.AS1	0.432369	2.87e-13
NCBP2	LINC00640	0.441007	8.47e-14
NCBP2	AC007611.1	0.431249	3.36e-13
NUDT1	KMT2E.AS1	0.506402	2.43e-18
NUDT1	PRRT3.AS1	0.442973	6.38e-14
NUDT1	TMEM105	0.406015	9.7e-12
NUDT1	PARD3.AS1	0.414931	3.05e-12
NUDT1	PPP4R1.AS1	0.425187	7.73e-13
NUDT1	AC084809.2	0.591326	6.54e-26
NUDT1	AC026803.1	0.407363	8.16e-12
NUDT1	AC004000.1	0.419236	1.72e-12
NUDT1	AC022210.1	0.414501	3.23e-12
NUDT1	AC104841.1	0.505992	2.62e-18
NUDT10	DNM3OS	0.410179	5.68e-12
NUDT10	RASSF8.AS1	0.519574	2.23e-19
NUDT10	FRMD6.AS2	0.470575	9.86e-16
NUDT10	LINC01489	0.426662	6.32e-13
NUDT16	LINC00885	0.557409	1.26e-22
NUDT16	AC007365.1	0.424833	8.11e-13
NUDT3	MEG3	0.535685	1.03e-20
NUDT3	RGS5	0.57149	6.06e-24
NUDT3	DIO3OS	0.439746	1.01e-13
NUDT3	STAG3L5P.PVRIG2P.PILRB	0.550272	5.55e-22
NUDT3	SH3BP5.AS1	0.568948	1.06e-23
NUDT3	GUSBP11	0.56124	5.6e-23
NUDT3	TPT1.AS1	0.549252	6.84e-22
NUDT3	LINC.PINT	0.448462	2.87e-14
NUDT3	LINC01089	0.40369	1.3e-11
NUDT3	LINC01001	0.525885	6.82e-20
NUDT3	CADM3.AS1	0.521825	1.46e-19
NUDT3	SLX1A.SULT1A3	0.543995	1.99e-21
NUDT3	AC024560.3	0.551556	4.26e-22
NUDT3	HOXA11.AS	0.561426	5.38e-23
NUDT3	AGAP11	0.57487	2.86e-24
NUDT3	LINC01002	0.511868	9.13e-19
NUDT3	AC159540.1	0.638132	3.91e-31
NUDT3	LINC00899	0.461873	3.83e-15
NUDT3	AC005523.2	0.642461	1.16e-31
NUDT3	JPX	0.529921	3.16e-20
NUDT3	FAM13A.AS1	0.408961	6.65e-12
NUDT3	LINC00847	0.414764	3.12e-12
NUDT3	AGAP2.AS1	0.508466	1.68e-18
NUDT3	N4BP2L2.IT2	0.406067	9.64e-12
NUDT3	LINC00265	0.433507	2.45e-13
NUDT3	LINC00702	0.484471	1.04e-16
NUDT3	ADAMTS9.AS2	0.503224	4.26e-18
NUDT3	AC083843.1	0.56601	2.01e-23
NUDT3	PP7080	0.46812	1.45e-15
NUDT3	CTC.338M12.4	0.601129	6.2e-27
NUDT3	PTOV1.AS1	0.581958	5.77e-25
NUDT3	LINC00893	0.545581	1.44e-21
NUDT3	CERS6.AS1	0.507336	2.06e-18
NUDT3	SLX1B.SULT1A4	0.541274	3.43e-21
NUDT3	AC093642.1	0.576638	1.93e-24
NUDT3	LINC01106	0.424032	9.04e-13
NUDT3	CCDC39	0.636823	5.63e-31
NUDT3	ZNF436.AS1	0.404836	1.13e-11
NUDT3	LINC00339	0.542217	2.84e-21
NUDT3	MATN1.AS1	0.440018	9.76e-14
NUDT3	RRN3P2	0.485752	8.44e-17
NUDT3	UBR5.AS1	0.669016	4.18e-35
NUDT3	AC138035.2	0.708295	6.64e-41
NUDT3	TGFB2.OT1	0.650405	1.17e-32
NUDT3	RARA.AS1	0.436	1.73e-13
NUDT3	AC005253.2	0.632811	1.7e-30
NUDT3	LINC00115	0.467456	1.61e-15
NUDT3	JAZF1.AS1	0.485226	9.21e-17
NUDT3	AC069213.1	0.460457	4.75e-15
NUDT3	OR2A1.AS1	0.478589	2.73e-16
NUDT3	LIMD1.AS1	0.631598	2.37e-30
NUDT3	HCG25	0.566519	1.8e-23
NUDT3	SEMA3F.AS1	0.478905	2.6e-16
NUDT3	LINC01391	0.47092	9.34e-16
NUDT3	AL162151.3	0.553331	2.95e-22
NUDT3	LINC01197	0.409815	5.95e-12
NUDT3	LINC00891	0.598871	1.07e-26
NUDT3	NPTN.IT1	0.471258	8.85e-16
NUDT3	SSBP3.AS1	0.582409	5.2e-25
NUDT3	ZSWIM8.AS1	0.601362	5.85e-27
NUDT3	ZNF582.AS1	0.532275	2.01e-20
NUDT3	AC006449.2	0.59166	6.04e-26
NUDT3	SLFNL1.AS1	0.489769	4.31e-17
NUDT3	ST7.AS1	0.480596	1.97e-16
NUDT3	AC005562.1	0.628336	5.75e-30
NUDT3	SNHG21	0.689834	4.6e-38
NUDT3	FAM157C	0.409786	5.97e-12
NUDT3	LINC00989	0.453934	1.27e-14
NUDT3	AP006222.2	0.554812	2.17e-22
NUDT3	NFYC.AS1	0.534035	1.43e-20
NUDT3	AC058791.1	0.510273	1.22e-18
NUDT3	USP3.AS1	0.502007	5.28e-18
NUDT3	RBM5.AS1	0.556301	1.59e-22
NUDT3	AC092171.4	0.657396	1.48e-33
NUDT3	AC007620.3	0.619656	5.74e-29
NUDT3	AL589743.1	0.667033	7.76e-35
NUDT3	FAM215B	0.475025	4.86e-16
NUDT3	PITPNA.AS1	0.547099	1.06e-21
NUDT3	AC093390.1	0.540679	3.86e-21
NUDT3	MORF4L2.AS1	0.573708	3.71e-24
NUDT3	TEX41	0.417965	2.04e-12
NUDT3	SPAG5.AS1	0.431514	3.24e-13
NUDT3	AC027601.1	0.434627	2.1e-13
NUDT3	AC016747.3	0.561582	5.2e-23
NUDT3	FAM27E3	0.443371	6.03e-14
NUDT3	AF131215.2	0.541621	3.2e-21
NUDT3	PITRM1.AS1	0.473889	5.83e-16
NUDT3	AC245100.1	0.545418	1.49e-21
NUDT3	AC009950.1	0.434582	2.11e-13
NUDT3	GLIDR	0.409664	6.07e-12
NUDT3	INE2	0.686329	1.51e-37
NUDT3	AP000350.5	0.533373	1.62e-20
NUDT3	MRGPRF.AS1	0.45695	8.1e-15
NUDT3	AL133243.1	0.574849	2.88e-24
NUDT3	PCOLCE.AS1	0.593849	3.59e-26
NUDT3	LINC00304	0.520162	2e-19
NUDT3	SEMA6A.AS1	0.497818	1.09e-17
NUDT3	HOXA10.AS	0.458557	6.35e-15
NUDT3	BMS1P4	0.455742	9.72e-15
NUDT3	FLJ46284	0.499138	8.71e-18
NUDT3	AP000432.1	0.564263	2.93e-23
NUDT3	LINC00506	0.475869	4.24e-16
NUDT3	MRPL23.AS1	0.479923	2.2e-16
NUDT3	SNHG22	0.464986	2.37e-15
NUDT3	C9orf106	0.506623	2.34e-18
NUDT3	GSN.AS1	0.533167	1.69e-20
NUDT3	AC113404.1	0.579883	9.26e-25
NUDT3	CPEB1.AS1	0.578475	1.27e-24
NUDT3	LINC00844	0.443988	5.51e-14
NUDT3	DLEU2L	0.561468	5.33e-23
NUDT3	LINC01126	0.527488	5.03e-20
NUDT3	SLC8A1.AS1	0.455594	9.94e-15
NUDT3	AC109642.1	0.650449	1.16e-32
NUDT3	BCRP3	0.569909	8.58e-24
NUDT3	C1orf229	0.478497	2.78e-16
NUDT3	KLHL30.AS1	0.513094	7.31e-19
NUDT3	DPP9.AS1	0.45406	1.25e-14
NUDT3	NAV2.AS1	0.645331	5.1e-32
NUDT3	SFTPD.AS1	0.442582	6.75e-14
NUDT3	PRICKLE2.AS1	0.471473	8.56e-16
NUDT3	NCAM1.AS1	0.422152	1.17e-12
NUDT3	KCNMA1.AS1	0.413807	3.54e-12
NUDT3	SLFN12L	0.528813	3.91e-20
NUDT3	AC090945.1	0.566419	1.84e-23
NUDT3	AC007405.4	0.455198	1.05e-14
NUDT3	ARAP1.AS2	0.484931	9.67e-17
NUDT3	LINC00906	0.430597	3.68e-13
NUDT3	FAM87B	0.576707	1.9e-24
NUDT3	ABALON	0.641739	1.42e-31
NUDT3	MIR133A1HG	0.485943	8.18e-17
NUDT3	GTF3C2.AS1	0.463297	3.07e-15
NUDT3	ARHGEF7.AS2	0.491111	3.44e-17
NUDT3	PRMT5.AS1	0.520495	1.88e-19
NUDT3	RASSF1.AS1	0.555549	1.86e-22
NUDT3	DKFZP434A062	0.493919	2.14e-17
NUDT3	AF230666.2	0.463419	3.02e-15
NUDT3	HID1.AS1	0.51577	4.49e-19
NUDT3	AC007292.3	0.526861	5.67e-20
NUDT3	ZEB2.AS1	0.495419	1.65e-17
NUDT3	EDRF1.AS1	0.631336	2.55e-30
NUDT3	LINC00880	0.568962	1.06e-23
NUDT3	MYCBP2.AS1	0.538324	6.16e-21
NUDT3	BEAN1.AS1	0.414418	3.27e-12
NUDT3	LINC01165	0.489009	4.9e-17
NUDT3	AC073052.1	0.454386	1.19e-14
NUDT3	AC009303.2	0.591014	7.04e-26
NUDT3	AC026904.1	0.553418	2.9e-22
NUDT3	AC114730.2	0.528697	3.99e-20
NUDT3	AC018647.3	0.462353	3.55e-15
NUDT3	PHEX.AS1	0.423688	9.48e-13
NUDT3	AL133493.2	0.411579	4.73e-12
NUDT3	TMLHE.AS1	0.613217	3.03e-28
NUDT3	NAMA	0.452835	1.5e-14
NUDT3	AP001471.1	0.518859	2.54e-19
NUDT3	LINC00216	0.429068	4.54e-13
NUDT3	SCARNA9	0.514199	5.98e-19
NUDT3	KCNIP2.AS1	0.490102	4.08e-17
NUDT3	MESTIT1	0.488276	5.54e-17
NUDT3	AP000962.1	0.52281	1.22e-19
NUDT3	COL4A2.AS1	0.405342	1.06e-11
NUDT3	COL18A1.AS1	0.447053	3.53e-14
NUDT3	ST7.OT4	0.492803	2.58e-17
NUDT3	PLCE1.AS1	0.422153	1.17e-12
NUDT3	AC007036.5	0.558194	1.07e-22
NUDT3	RBAKDN	0.452155	1.66e-14
NUDT3	SMCR5	0.43385	2.34e-13
NUDT4	A2M.AS1	0.417553	2.16e-12
NUDT4	LINC00924	0.435648	1.81e-13
NUDT4	LINC01579	0.449494	2.47e-14
NUDT4	PGM5P3.AS1	0.530398	2.88e-20
NUDT4	ADAMTS19.AS1	0.624708	1.52e-29
NUDT4	FGF13.AS1	0.452454	1.59e-14
NUDT4	TBX5.AS1	0.439087	1.11e-13
NUDT4	NFIA.AS2	0.409874	5.91e-12
NUDT5	LINC00511	0.403456	1.34e-11
SNUPN	AC105339.2	0.432557	2.8e-13
